# Supplementary material for: Defective phase engineering of S-scheme TiO2–SnS/SnS2 core–shell photocatalytic nanofibers for elevated visible light responsive H2 generation and nitrogen fixation
Source: Royal Society of Chemistry journal article supplement (doi:10.1039/d4ta05970k), 2024-01-01
Supplement: d4ta05970k1.pdf [file d4ta05970k1.pdf]

## Supporting Information

# Defective phase engineering of S-Scheme TiO<sub>2</sub>-SnS/SnS<sub>2</sub> core-shell Photocatalytic nanofibers for elevated Visible light responsive H<sub>2</sub> generation and Nitrogen fixation

*Kugalur Shanmugam Ranjith<sup>a</sup>, Seyed Majid Ghoreishian<sup>b</sup>, Ali Mohammadi<sup>a</sup>, Ganji Seeta Rama Raju<sup>a</sup>, Yun Suk Huh<sup>c,\*</sup>, Young-Kyu Han<sup>a,\*</sup>*

<sup>a</sup>Department of Energy and Material Engineering, Dongguk University-Seoul, Seoul 04620, South Korea

<sup>b</sup>Department of Chemical Engineering, University of South Carolina, Columbia, SC, USA

<sup>c</sup>Department of Biological Engineering, Inha University, Incheon 22212, South Korea

\*Corresponding authors: yunsuk.huh@inha.ac.kr (Y. S. Huh), ykenergy@dongguk.edu (Y.-K. Han)

## **1. Experimental details**

### **1.1. Characterization details**

The electrospun nanostructures were analyzed for morphology and the elemental content using a field emission scanning electron microscope (FESEM, Hitachi S-4700), an energy dispersive X-ray spectrometer (EDX)-equipped with high-resolution transmission electron microscopy (HRTEM, JEOL JEM-2100) at an accelerating voltage of 200 kV. Energy-dispersive X-ray spectroscopy (EDX) was utilized to confirm the composition and elemental mapping. The structural features of the TiO<sub>2</sub>-SnS heterostructures were measured by a PANalytical X'Pert multipurpose X-ray diffractometer with Cu K $\alpha$  radiation. Using a JASCO V-770 UV-vis spectrophotometer and a FEX, NOST, Republic of Korea PL spectrophotometer, the UV-vis diffuse reflectance spectra (DRS) and photoluminescence (PL) measurements were obtained. The surface chemical composition was examined using Thermo K-alpha-monochromated X-ray photoelectron spectroscopy (XPS) with an Al K (1486.6 eV) source. After the samples were degassed for three hours at 200 °C, the Brunauer-Emmet-Teller (BET) analysis was used to determine the samples' specific surface area utilizing ASAP ZOZO (Micromeritics Co. USA). Using a UV-vis spectrophotometer (JASCO V-770), the UV-vis absorbance spectra of the pollutants were used to examine the dye degradation. A Bruker model A300 spectrometer (microwave frequency of 9.86 GHz, modulation amplitude of 3 G, modulation frequency of 100 kHz, microwave power of 6.37 mW, temperature of 298 K) was used to conduct electron paramagnetic resonance (EPR). Using HORIBA Delta Pro, time-resolved PL (TRPL) spectra were obtained at an excitation wavelength of 350 nm.

### **1.2. Photocatalytic experiments for H<sub>2</sub> evolution**

The heterostructure catalyst (100 mg) with the TEOA aqueous solution (10%, 100 mL) serving as a trapping agent was sonicated for 10 min, and the mixture was introduced into a sealed glass reactor to investigate the photocatalytic hydrogen production from water splitting. The reactor was completely degassed to remove the air and stirred for 30 min in N<sub>2</sub> bubbling to maintain the atmosphere inert. A 300 W Xe lamp (PhotoFluorII) equipped with a UV-cut-off filter ( $\lambda \geq 420$  nm) was used as the light source. The photo reactor had a quartz window with a top irradiation area of about 28.26 cm<sup>2</sup>. During the reaction, the temperature was kept at 15 °C using cooling water circulation. The evolved H<sub>2</sub> was quantified by gas chromatography (GC) with a thermal conductive detector (TCD, connected to a TDX-01 molecular sieve column). Besides, N<sub>2</sub> was used as carrier gas. The apparent quantum yield (AQY) was calculated for different incident monochromatic wavelengths (365, 420, 450, 520, and 650 nm) according to the following equation:

$$AQE = \frac{2 \times \text{number of } H_2 \text{ molecules } (n)}{\text{Number of incident photos } (N)} \dots\dots\dots(1)$$

### 1.3. Photocatalytic experiments for N<sub>2</sub> fixation

The photocatalytic N<sub>2</sub> fixation reaction was performed under a 300 W Xe lamp (PhotoFluorII) equipped with a top-irradiated quartz reactor. Typically, 10 mg of photocatalyst was dispersed in 50 mL of distilled H<sub>2</sub>O without any sacrificial agents and ultrasonicated for 10 min. The mixture was transferred into the reactor and vacuum-degassed for 30 min. Afterward, high-purity N<sub>2</sub> (>99.999%) bubbled into the system. The degassing and bubbling processes were repeated five times. Finally, the N<sub>2</sub> was bubbled for another 30 min before the light was turned on, and it

continued to bubble throughout the reaction process at a flow rate of 100 mL/min. The reactor was built with a water-circulating system to keep the temperature of the reaction environment constant at 2 °C. Under photoirradiation, every 30 min, 1 mL of liquid was collected and filtered with a 0.22 µm filter, and ammonia concentration was detected by Nessler's reagent method using UV spectrophotometry. Ar gas was purged at the same rate in the evacuated reaction vessel instead of N<sub>2</sub> for the control experimental condition. **Fig. S5** shows the calibration curve of Nessler's reagent method, with an R<sub>2</sub> value greater than 0.997.

#### **1.4. Photoelectrochemical measurements**

The measurement for the photocurrent, Mott-Schottky (M-S), linear sweep voltammetry, and electrochemical impedance (EIS) characterization were analyzed using Metrohm Autolab (PGSTAT302N) electrochemical workstation in a standard three-electrode system with Pt wire as counter electrode and Ag/AgCl (sat. KCl) as reference electrode. The catalytic slurry was loaded on a FTO substrate and used as a working electrode. The catalytic slurry was prepared by mixing catalyst (10 mg) and Nafion solution (5 wt%, 20 µL) in EtOH (0.5 mL). A 300 W Xe lamp (PhotoFluorII) equipped with a UV-cut-off filter ( $\lambda \geq 420$  nm) was used as the light source. In this experiment, 0.5 M Na<sub>2</sub>SO<sub>4</sub> aqueous solution was used as the electrolyte for the photo-responsive measurements.

## 1.5. Computational Methodology

After drawing the structures based on the XRD spectrum, the composite structure was optimized for declination the residual forces on the atoms to less than  $0.03 \text{ eV}\cdot\text{\AA}^{-1}$ . Basic calculations with QuantumATK software. For bulk calculations, we employed the linear combination of atomic orbitals (LCAO) approach within the generalized gradient approximation (GGA) using the Perdew-Burke-Ernzerhof (PBE) functional. The basis set used was double zeta polarization (DZP) to ensure an accurate description of the electronic states. A density mesh cutoff of 80 Hartree was applied to improve the resolution of the charge density, and a grid spacing of  $4.0 \text{ \AA}$  was used. Non-equilibrium Green's function (NEGF) Device Calculations: For the device simulations, we employed the NEGF formalism using the same LCAO-GGA method with the DZP basis set to describe the electronic structure. A Monkhorst-Pack k-point grid of  $7\times 3\times 9$  was chosen for accurate sampling along the device and transport directions. The density mesh cutoff was set to 80 Hartree to ensure convergence in charge and potential.

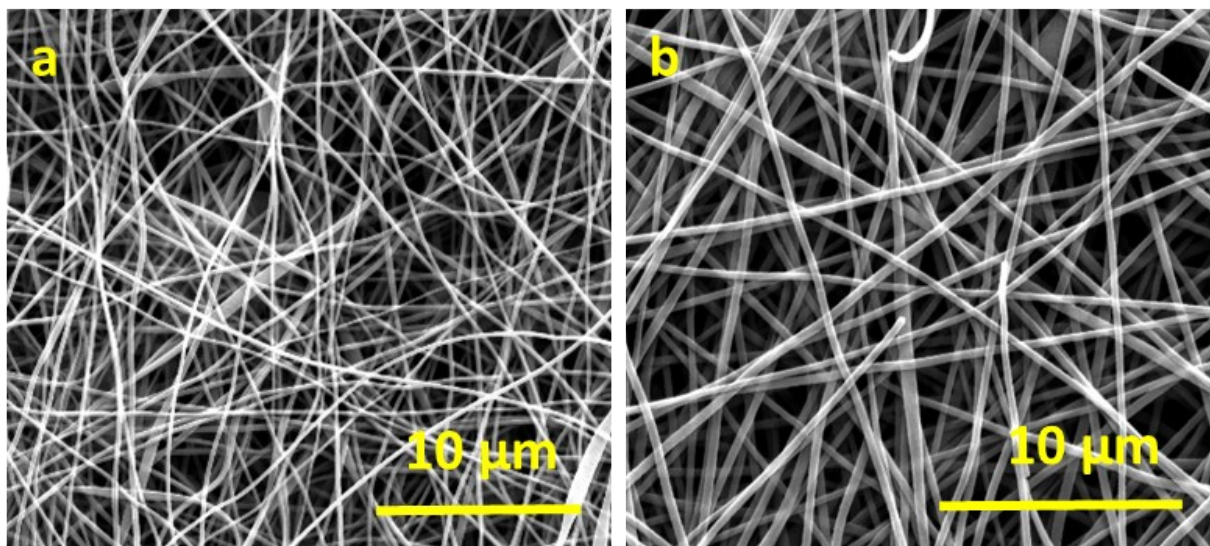

**Fig. S1.** FESEM images of The Ti-PVP and Ti/Sn-PVP based as prepared nanofibers. (a) Ti-PVP NFs, (b) Ti/Sn (0.4/0.2 mL h<sup>-1</sup>)-PVP core-shell NFs.

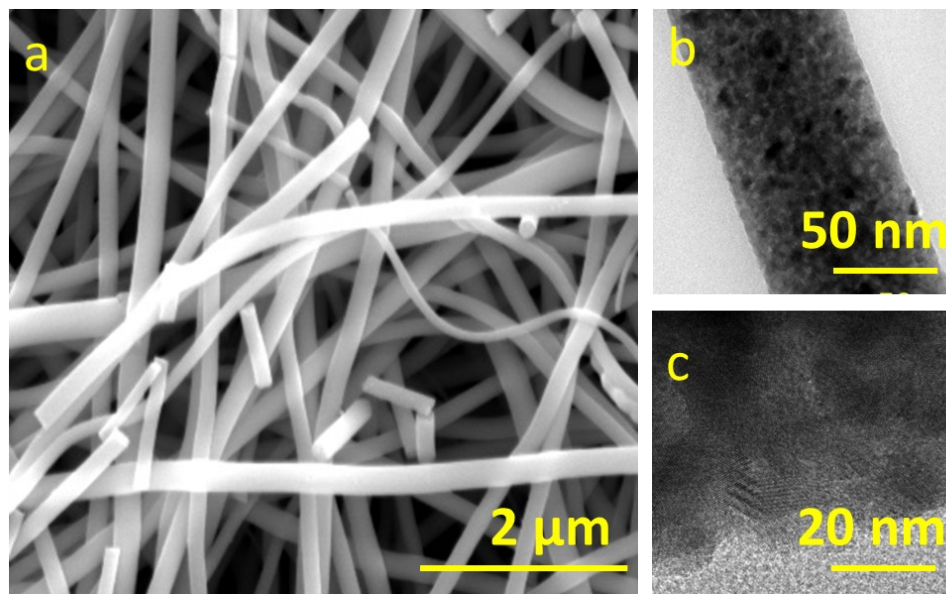

**Fig. S2.** SEM and TEM images of the  $\text{TiO}_2$  nanofibers prepared through the electrospinning process.

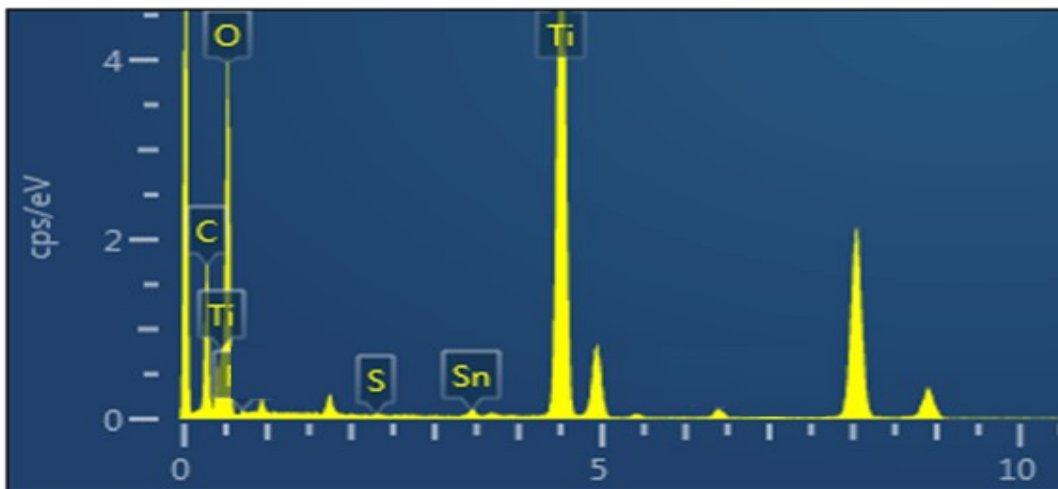

**Fig. S3.** EDAX spectra of the  $\text{TiO}_2\text{-SnS/SnS}_2$  (2:2) NFs.



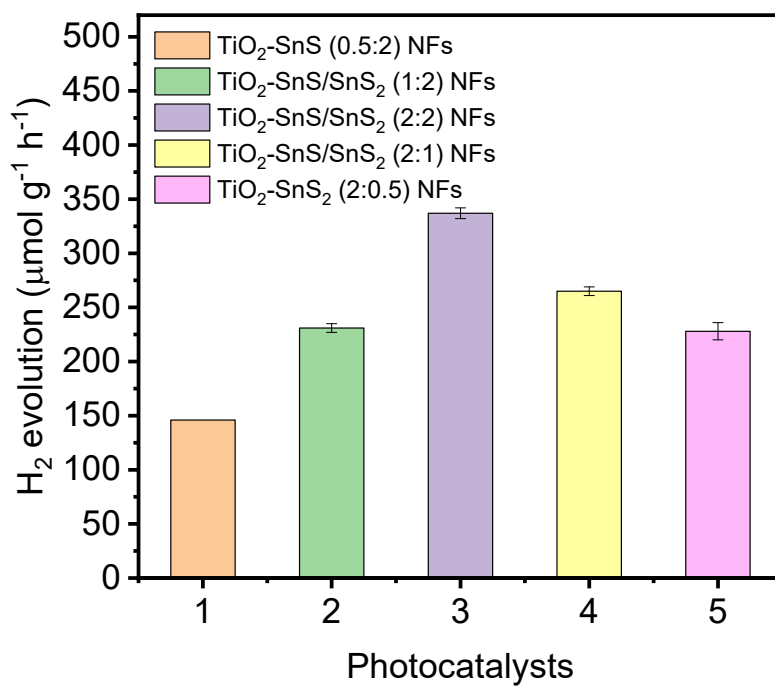

**Fig. S4.** Average rate of Photocatalytic H<sub>2</sub> evolution over TiO<sub>2</sub>-based heterostructure NFs under visible irradiation.

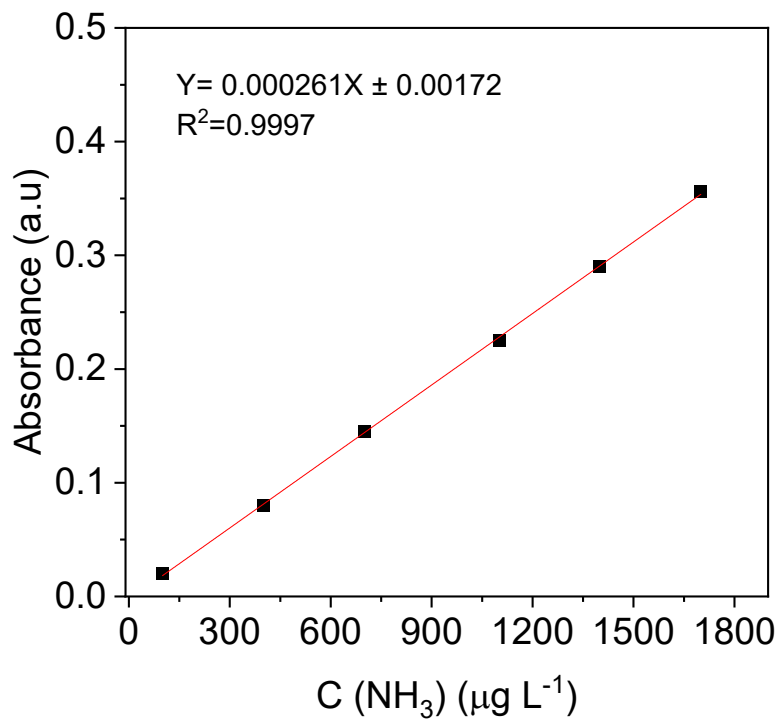

**Fig. S5.** The Standard curve of ammonia solution with different concentrations calculated from UV-Vis absorption spectra at  $\lambda=420$  nm was measured using the Nessler reagent chromogenic method.

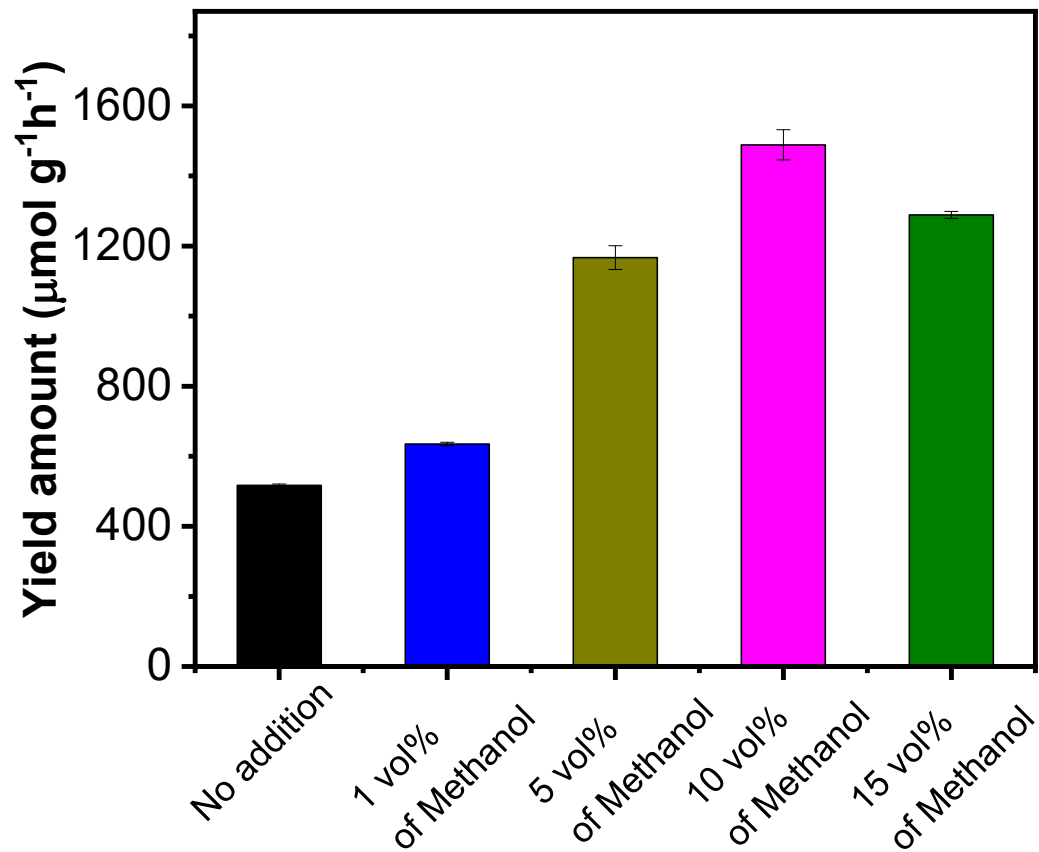

**Fig. S6.**  $\text{NH}_3$  production rate over  $\text{TiO}_2\text{-SnS/SnS}_2$  (2:2) NFs under visible irradiation ( $>420$  nm) with adding different volume content of methanol.

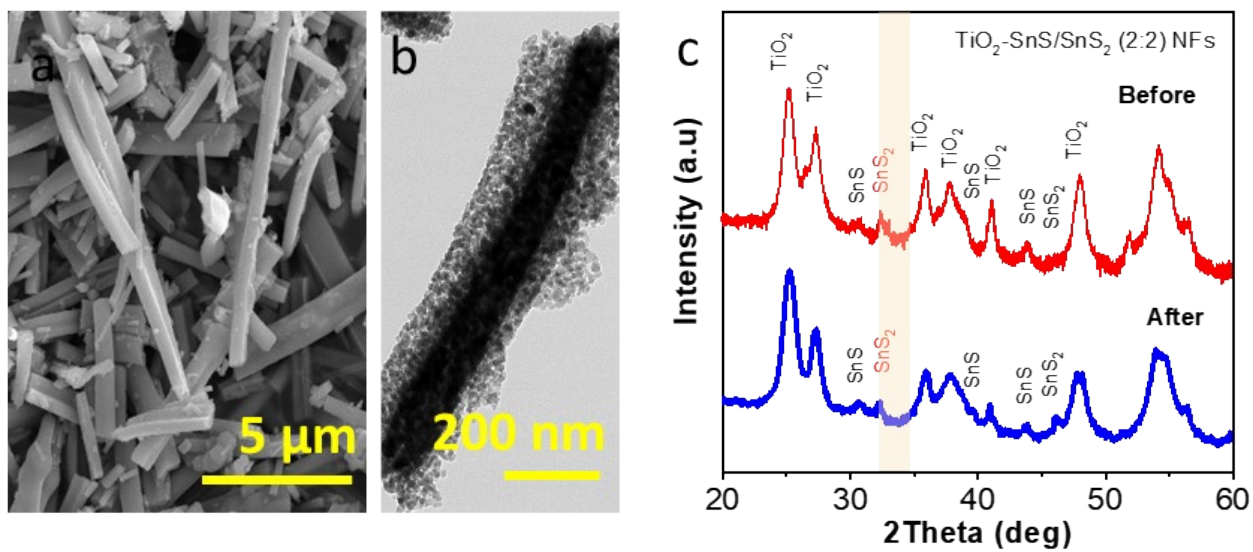

**Fig. S7.** (a, b) FE-SEM and TEM of the reused catalyst; (c) XRD of  $\text{TiO}_2\text{-SnS/SnS}_2$  (2:2) NFs before and after the cyclic test.

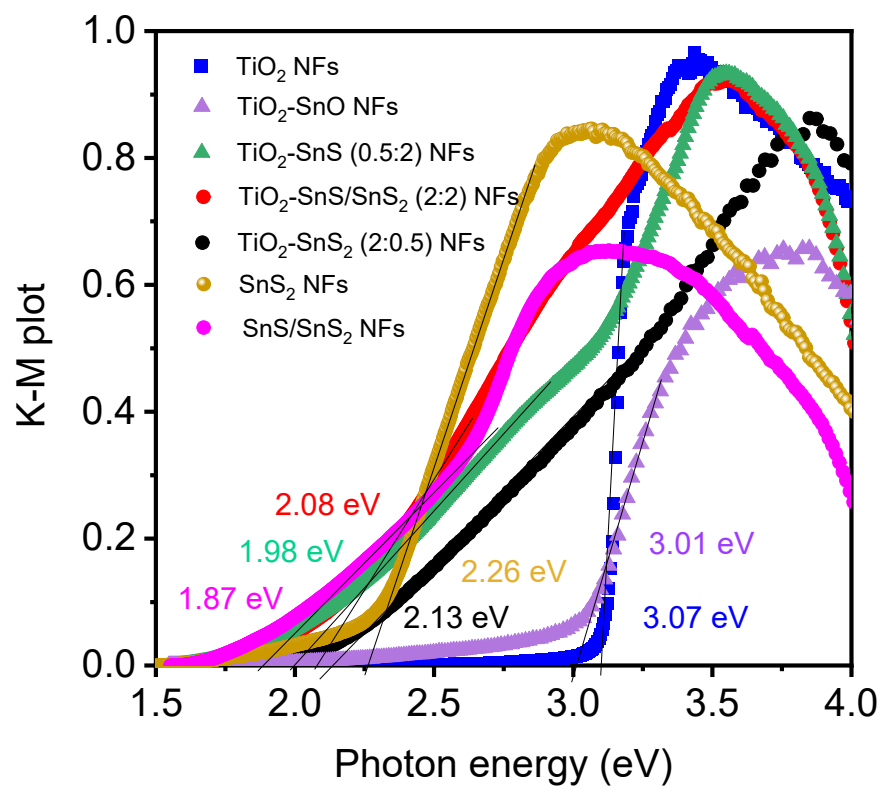

**Fig. S8.** (a) K-M plot for the TiO<sub>2</sub>, SnS<sub>2</sub>, SnS/SnS<sub>2</sub>, and TiO<sub>2</sub> based heterostructure NFs.

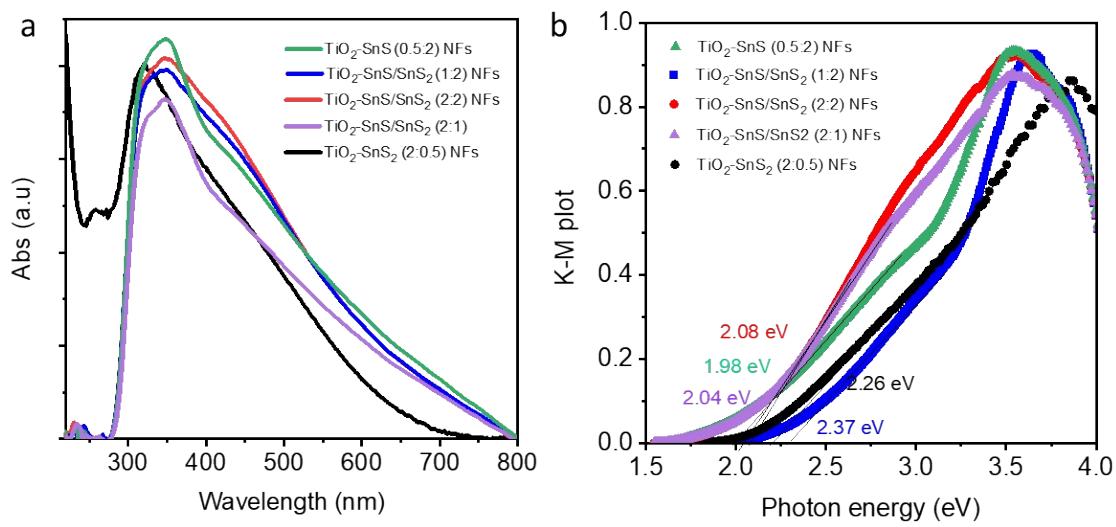

**Fig. S9.** (a) UV-Vis DRS, (b) K-M plot of TiO<sub>2</sub>-SnS<sub>x</sub> NFs.

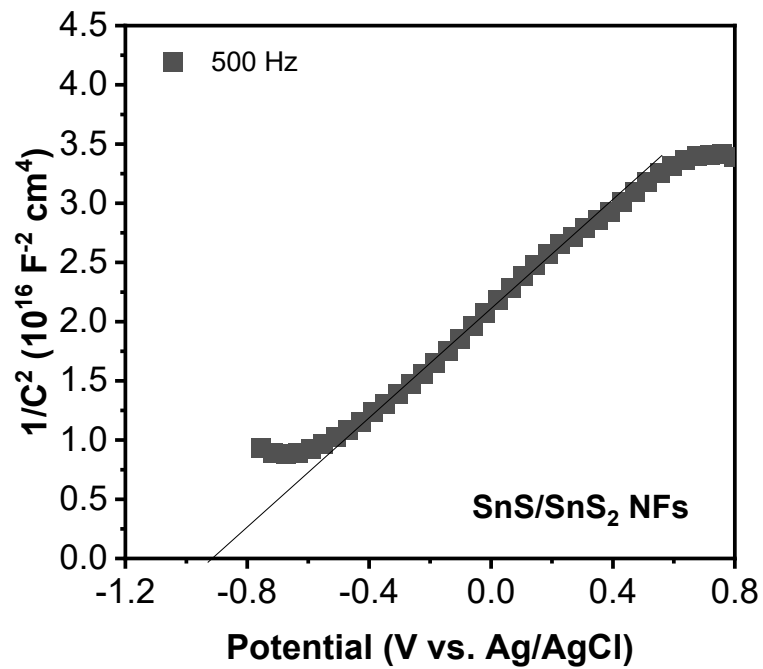

**Fig. S10.** Mott-Schottky plot of SnS/SnS<sub>2</sub> NFs.

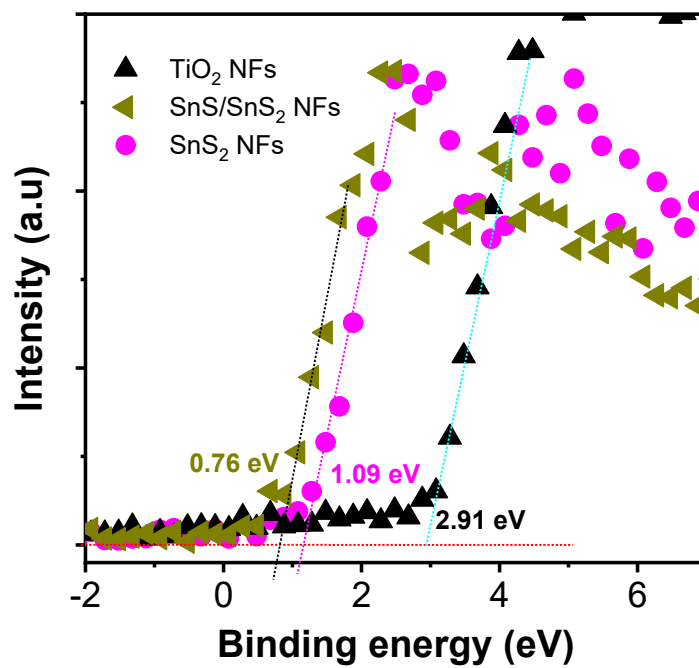

**Fig. S11.** XPS valence band spectra of SnS<sub>2</sub> and SnS/SnS<sub>2</sub> NFs.



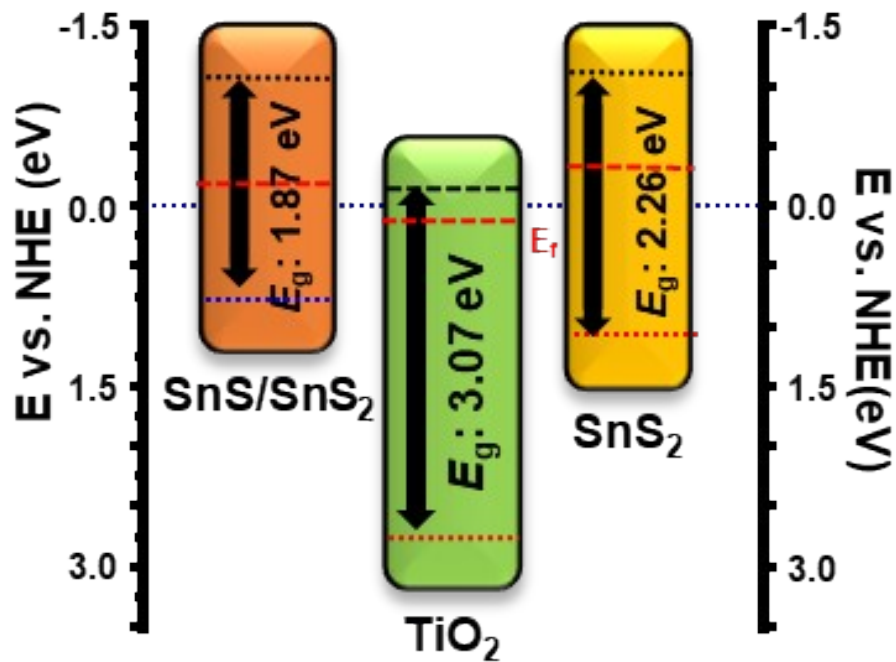

**Fig. S12.** Energy band structure TiO<sub>2</sub>, SnS<sub>2</sub>, SnS/SnS<sub>2</sub> before getting the heterostructure interface.

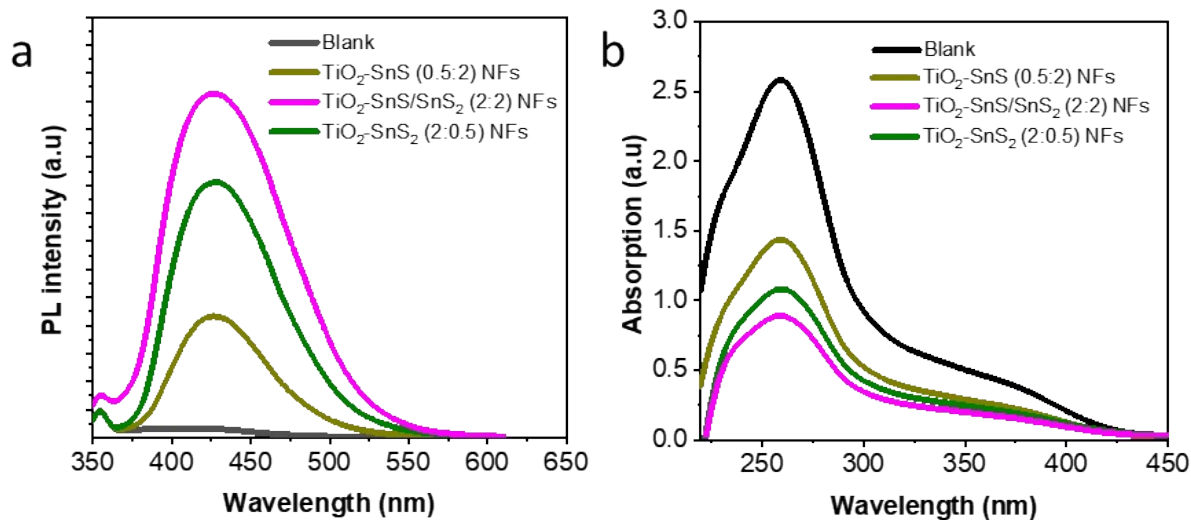

**Fig. S13.** (a) Fluorescence profile of terephthalic acid, and (b) NBT abs decrease rate in presence of TiO<sub>2</sub>-SnS<sub>x</sub> NFs under photo irradiation.

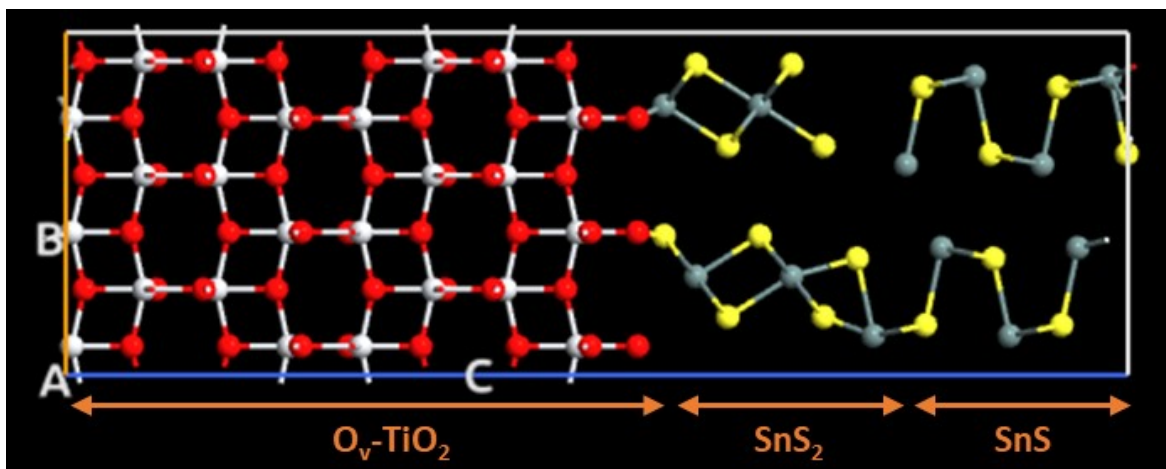

**Fig. S14.** The primary crystal structure of 3 main layers in the  $O_v\text{-TiO}_2\text{-SnS/SnS}_2$  layers.

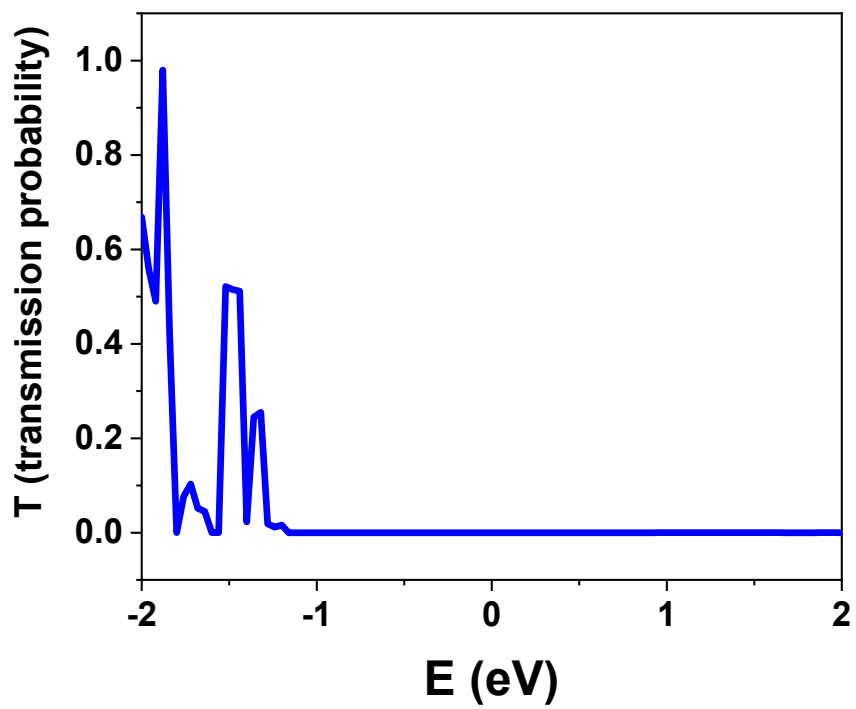

**Fig. S15.** Electron transmission spectrum through the  $O_v$ -TiO<sub>2</sub>-SnS/SnS<sub>2</sub> system in respect of applied potential (light radiation).

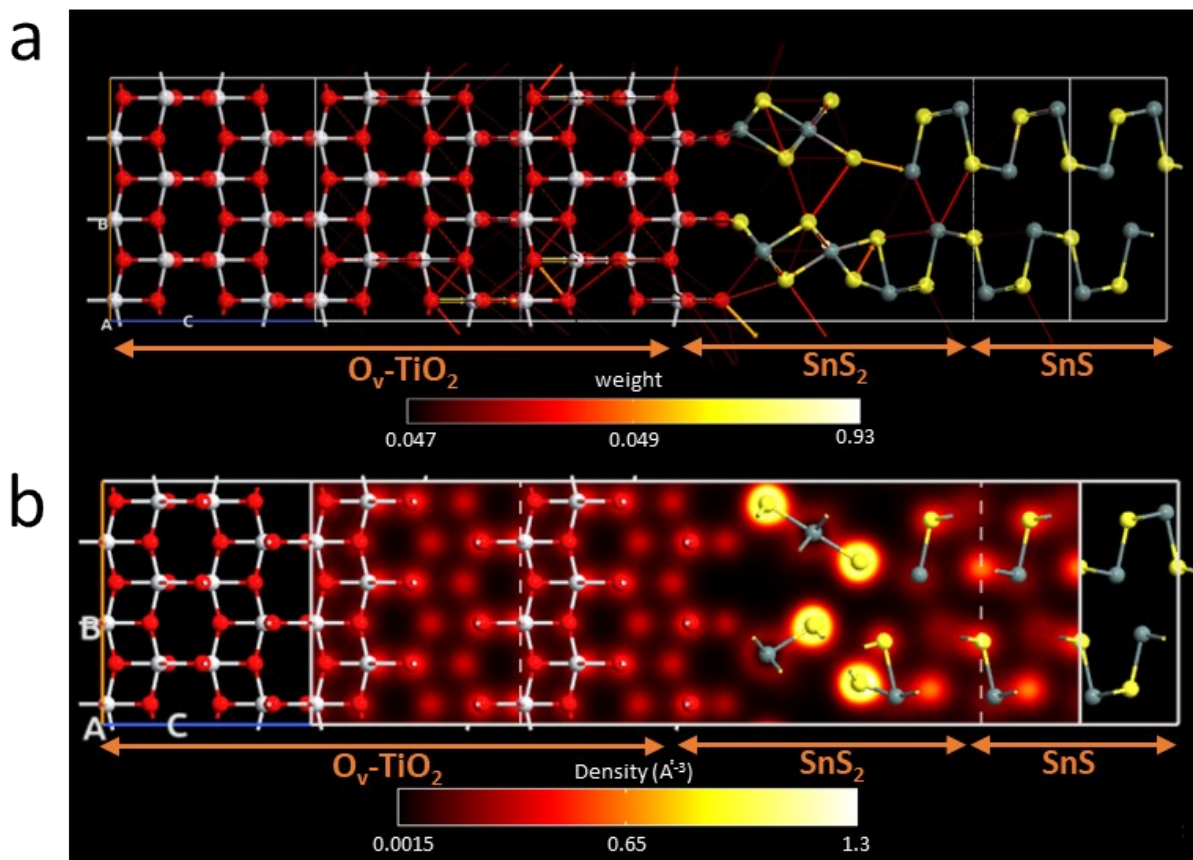

**Fig. S16** (a) Transmission intensity of electrons passage, (b) Density of electrons passage through the photocatalyst layers of  $\text{TiO}_2\text{-SnS/SnS}_2$ .

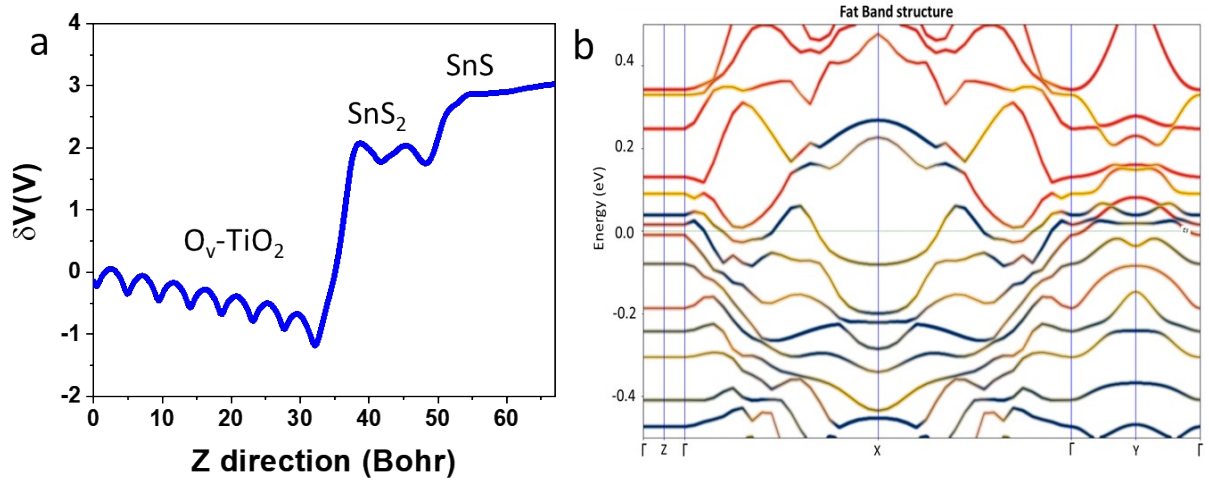

**Fig. S17** (a) Potential vs. direction in  $\text{TiO}_2\text{-SnS/SnS}_2$  (1 bohr = 0.52918 angstroms). (b) Fat band diagram of different atomic orbitals on the electronic properties around the Fermi level of  $\text{TiO}_2\text{-SnS/SnS}_2$  (dominate role of P-orbitals of sulfur (orange curve) and d-orbitals of titanium (red curve)).

**Table S1.** The presence of O and S-related energy states on fabricated Ti-based heterostructures estimated from the XPS analysis

| Samples                                          | O 1s (at%)         |                    |                    | S 1s (at%) |                    |
|--------------------------------------------------|--------------------|--------------------|--------------------|------------|--------------------|
|                                                  | O <sub>L</sub> (%) | O <sub>V</sub> (%) | O <sub>C</sub> (%) | Sn-S (%)   | S <sup>2</sup> (%) |
| TiO <sub>2</sub> NFs                             | 80.45              | 4.39               | 15.17              | --         | --                 |
| TiO <sub>2</sub> -SnO NFs                        | 79.26              | 15.54              | 5.20               | --         | --                 |
| TiO <sub>2</sub> -SnS (0.5:2) NFs                | 78.87              | 19.23              | 1.80               | 67.30      | 27.30              |
| TiO <sub>2</sub> -SnS/SnS <sub>2</sub> (2:2) NFs | 28.65              | 60.63              | 10.72              | 84.36      | 13.61              |
| TiO <sub>2</sub> -SnS <sub>2</sub> (2:0.5) NFs   | 67.85              | 27.67              | 4.47               | 78.56      | 20.62              |

**Table S2.** Comparison of activity with reported photocatalytic nitrogen fixation.

| Catalyst                                                        | Scavenger        | Light source          | Ammonia yield<br>( $\mu\text{mol. g}^{-1} \cdot \text{h}^{-1}$ ) | Ref       |
|-----------------------------------------------------------------|------------------|-----------------------|------------------------------------------------------------------|-----------|
| TiO <sub>2</sub> -SnS/SnS <sub>2</sub>                          | None             | > 420 nm              | 517                                                              | This work |
|                                                                 |                  | Full spectrum         | 1179                                                             | This work |
| Au/TiO <sub>2</sub>                                             | 20vol% Ethanol   | 300 W Xe-lamp         | 56.3                                                             | [1]       |
| V <sub>Zn</sub> /Zn <sub>3</sub> In <sub>2</sub> S <sub>6</sub> | Methanol         | $\lambda \geq 420$ nm | 164.4                                                            | [2]       |
| MoS <sub>2</sub> /CdS                                           | Methanol         | 300 W Xe-lamp         | 173.3                                                            | [3]       |
|                                                                 |                  | $\lambda \geq 420$ nm |                                                                  |           |
| Mn <sub>0.5</sub> Cd <sub>0.5</sub> S                           | Methanol         | $\lambda \geq 420$ nm | 121.9                                                            | [4]       |
| /CoTiO <sub>3</sub>                                             | (10 vol%)        |                       |                                                                  |           |
| Ru-TiO <sub>2</sub>                                             | None             | Full spectrum         | 315                                                              | [5]       |
| TiO <sub>2</sub> /g-C <sub>3</sub> N <sub>4</sub>               | None             | $\lambda \geq 420$ nm | 485                                                              | [6]       |
| TiO <sub>2</sub> -Au-BiOI                                       | None             | Full spectrum         | 543.5                                                            | [7]       |
| BiOBr/TiO <sub>2</sub>                                          | None             | Full spectrum         | 950                                                              | [8]       |
| TiO <sub>2</sub> /MIL-88A(Fe)/g-C <sub>3</sub> N <sub>4</sub>   | 20 vol% methanol | simulated sunlight    | 1084.31                                                          | [9]       |
| TiO <sub>2</sub> -Au-BiOI                                       | None             | UV-vis                | 534.5                                                            | [10]      |
| AgCl/d-Bi <sub>2</sub> O <sub>3</sub>                           | None             | Vis (400W Xe)         | 606                                                              | [11]      |
| TiO <sub>2</sub> (OVs)                                          | 10 vol% methanol | Simulated sunlight    | 324.86                                                           | [12]      |
| CaTiO <sub>3</sub> (OVs)                                        | 1 vol% methanol  | Natural sunlight      | 236.12                                                           | [13]      |



## Reference

- [1] S. Liu, Y. Wang, S. Wang, M. You, S. Hong, T.-S. Wu, Y.-L. Soo, Z. Zhao, G. Jiang, Q. Jieshan, B. Wang, Z. Sun, Photocatalytic fixation of nitrogen to ammonia by single Ru atom decorated TiO<sub>2</sub> nanosheets, *ACS Sustainable Chemistry & Engineering*, 7 (2019) 6813-6820.
- [2] H. Han, Y. Yang, J. Liu, X. Zheng, X. Wang, S. Meng, S. Zhang, X. Fu, S. Chen, Effect of Zn vacancies in Zn<sub>3</sub>In<sub>2</sub>S<sub>6</sub> nanosheets on boosting photocatalytic N<sub>2</sub> fixation, *ACS Applied Energy Materials*, 3 (2020) 11275-11284.
- [3] X. Zheng, H. Han, J. Liu, Y. Yang, L. Pan, S. Zhang, S. Meng, S. Chen, Sulfur vacancy-mediated electron-hole separation at MoS<sub>2</sub>/CdS heterojunctions for boosting photocatalytic N<sub>2</sub> reduction, *ACS Applied Energy Materials*, 5 (2022) 4475-4485.
- [4] H. Lv, M. Zhan, G. Li, F. Zhang, Z. Suo, C. Zhou, B. Wan, G. Wang, Y. Liu, Construction of a direct Z-scheme Mn<sub>0.5</sub>Cd<sub>0.5</sub>S/CoTiO<sub>3</sub> heterojunction with enhanced photocatalytic nitrogen fixation performance, *Applied Surface Science*, 655 (2024), 159572.
- [5] G. Ren, M. Shi, S. Liu, Z. Li, Z. Zhang, X. Meng, Molecular-level insight into photocatalytic reduction of N<sub>2</sub> over by electronic Metal-support interaction, *Chem. Eng. J.* 454 (2023) 140158.
- [6] S. Wu, C. He, L. Wang, J. Zhang, High-efficiency electron tandem flow mode on carbon nitride/titanium dioxide heterojunction for visible light nitrogen photo fixation, *Chem. Eng. J.* 443 (2022) 136425.
- [7] X. Yu, H. Qiu, Z. Wang, B. Wang, Q. Meng, S. Sun, Y. Tang, K. Zhao, Constructing the Z-scheme TiO<sub>2</sub>/Au/BiOI nanocomposite for enhanced photocatalytic nitrogen fixation, *Appl. Surf. Sci.* 556 (2021) 149785.
- [8] X. Su, X. Zhang, M. Gao, X. Li, J. Chang, L. Hu, D. Geng, Y. Ren, T. Wei, J. Feng, Electron deficient Bi<sup>3+δ</sup> serves as N<sub>2</sub> absorption sites and inhibits carriers recombination to enhance N<sub>2</sub> photo-fixation in BiOBr/TiO<sub>2</sub> S-scheme heterojunction, *Journal of Colloid and Interface Science*, 663 (2024), 61-72.
- [9] Q. Ding, X. Zou, J. Ke, Y. Dong, Y. Cui, H. Ma, Enhanced artificial nitrogen fixation efficiency induced by construction of ternary TiO<sub>2</sub>/MIL-88A(Fe)/g-C<sub>3</sub>N<sub>4</sub> Z-scheme heterojunction, *Journal of Colloid and Interface Science*, 649 (2023), 148-158.

- [10] X. Yu, H. Qiu, Z. Wang, B. Wang, Q. Meng, S. Sun, Y. Tang, K. Zhao, Constructing the Z-scheme TiO<sub>2</sub>/Au/BiOI nanocomposite for enhanced photocatalytic nitrogen fixation, *Applied Surface Science*, 556 (2021), 149785.
- [11] X. Gao, Y. Shang, L. Liu, F. Fu, Chemisorption-enhanced Photocatalytic Nitrogen Fixation via 2D Ultrathin P-N Heterojunction AgCl/ $\delta$ -Bi<sub>2</sub>O<sub>3</sub> Nanosheets. *Journal of Catalysis*, 37 (2019), 71-80.
- [12] G. Zhang, X. Yang, C. He, P. Zhang, H. Mi, Constructing a tunable defect structure in TiO<sub>2</sub> for photocatalytic nitrogen fixation, *J. Mater. Chem. A*, 8 (2020), 334- 341.
- [13] A. Kumar, M. Kumar, V. N. Rao, M. V. Shankar, S. Bhattacharya, V. Krishnan, Unraveling the structural and morphological stability of oxygen vacancy engineered leaf-templated CaTiO<sub>3</sub> towards photocatalytic H<sub>2</sub> evolution and N<sub>2</sub> fixation reactions, *J. Mater. Chem. A*, 9 (2021), 17006-17018.
